# Supplementary material for: Two coordination polymers displaying unusual threefold 1D→1D and threefold 2D→3D interpenetration topologies
Source: Royal Society of Chemistry journal article supplement (doi:10.1039/b905427h), 2009-01-01
Supplement: b905427h.pdf [file b905427h.pdf]

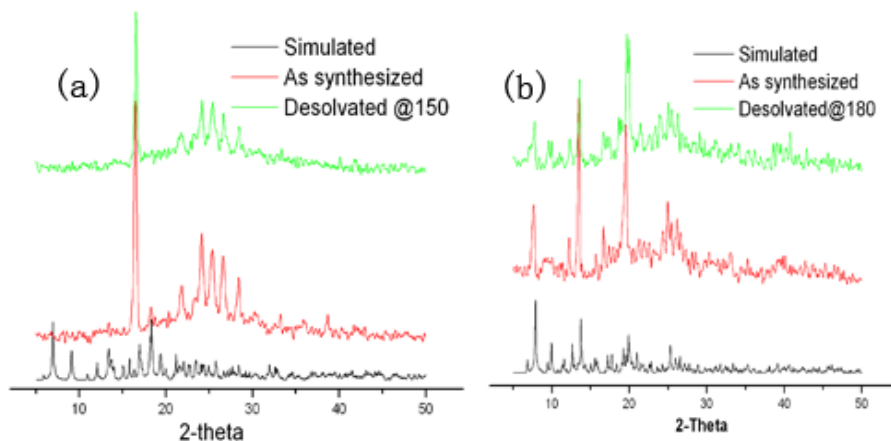

**Fig. S1** (a) Comparison of XRPD patterns of the simulated pattern from the single-crystal structure determination, the as-synthesized and the desolvated products in compound **1**; and (b) Comparison of XRPD patterns of the simulated pattern from the single-crystal structure determination, the as-synthesized and the desolvated products in compound **2**.

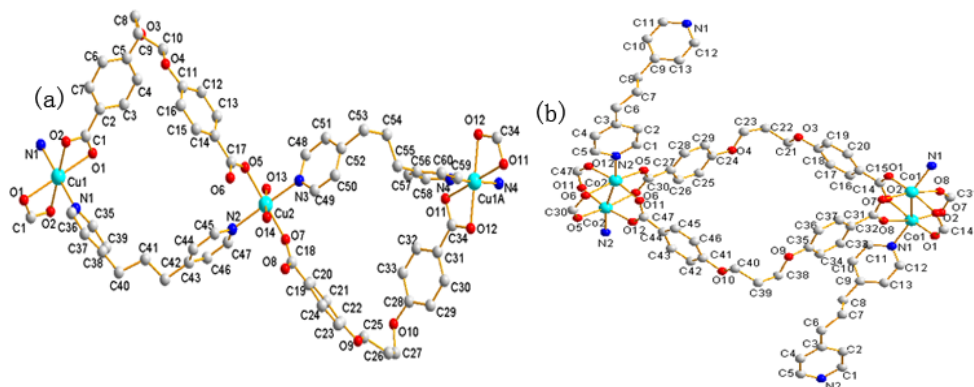

**Fig. S2.** (a) A view of the coordination environments at the three Cu<sup>II</sup> centers in **1**(top); and (b) the coordination environments at the three Co<sup>II</sup> centers in **2** (down).

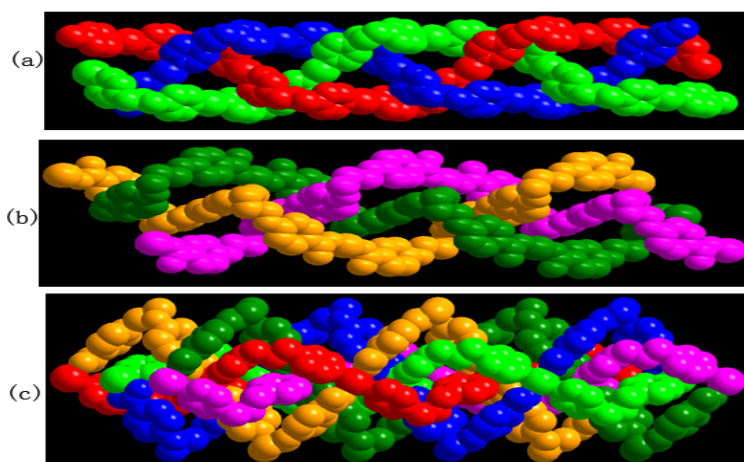

**Fig. S3** (a) Space-filling view of the first type of triple-stranded molecular braid; (b) Space-filling view of the second type of triple-stranded molecular braid; and (c) Space-filling view of sextuple-stranded molecular braid along the *c* axis.

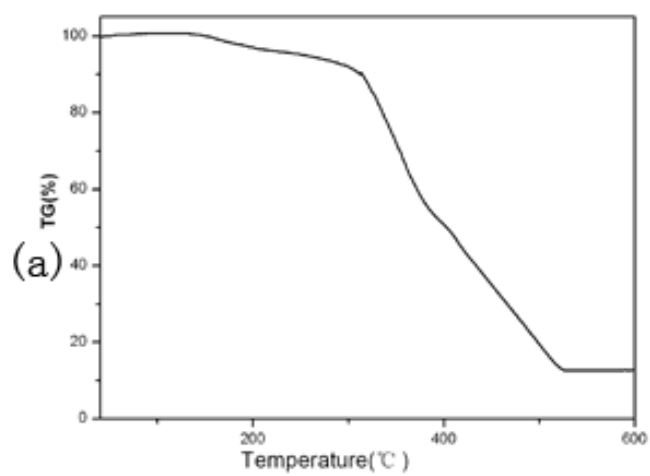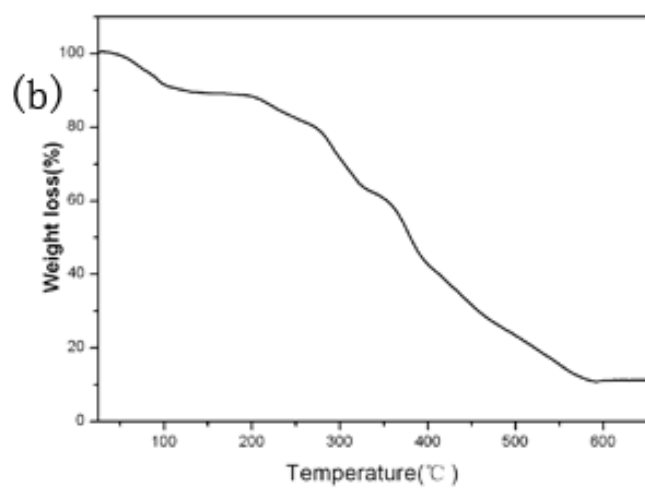

**Fig. S4** (a) TG curve of compound 1; and (c) TG curve of compound 2.
